# Supplementary material for: Nitrogen-doped hierarchical porous CNF derived from fibrous structured hollow ZIF-8 for a high-performance supercapacitor electrode
Source: Royal Society of Chemistry journal article supplement (doi:10.1039/c9ra07846k), 2019-01-01
Supplement: c9ra07846k1.pdf [file c9ra07846k1.pdf]

## Electronic Supplementary Information

### **Nitrogen-doped hierarchical porous CNF derived from fibrous structured hollow ZIF-8 for high-performance supercapacitor electrode**

**Hongjiao Nie, <sup>\*a</sup> Kan Mi, <sup>a</sup> Lanlan Song <sup>a</sup> and Xiuwen Zheng <sup>\*a</sup>**

<sup>a</sup> Key Laboratory of Functional Nanomaterials and Technology in Universities of Shandong, School of Chemistry and Chemical Engineering, Linyi University, Linyi 276000, China

**Fax: +86-0539-7258151**

**E-mail: [niehongjiao2011@163.com](mailto:niehongjiao2011@163.com), [zhengxiuwen@lyu.edu.cn](mailto:zhengxiuwen@lyu.edu.cn)**

## **Experimental section**

### **Preparation of ZIF-8 derived nitrogen doped porous carbon**

ZIF-8 was synthesized using the following procedure: initially, 0.8 g  $\text{Zn}(\text{AC})_2 \cdot 2\text{H}_2\text{O}$  was dissolved in 5 mL deionized water and stirred for 10 min. Then, 5 mL deionized water, containing 1.12 g dimethylimidazole (2MI), was added slowly and stirred for 30 s at room temperature. After 24 h's standing, the white product was centrifuged, wash with deionized water several times and dried at 70 °C to obtain ZIF-8 particle. Afterwards, ZIF-8 particle was carbonized at 1073 K for 2 h at a heating rate of 5 K  $\text{min}^{-1}$  under Ar atmosphere, and washed with HCl (2 mol  $\text{L}^{-1}$ ) for 24 h under vigorous stirring at room temperature.

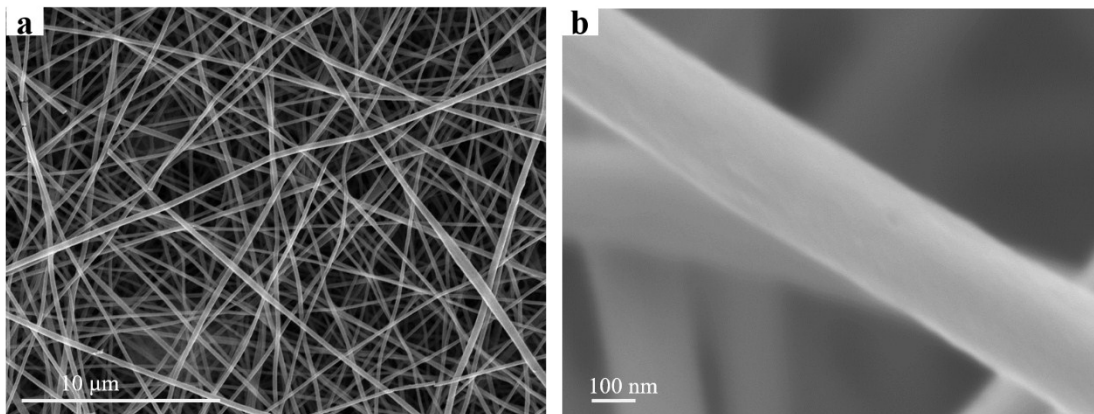

Figure S1. SEM images of CNF.

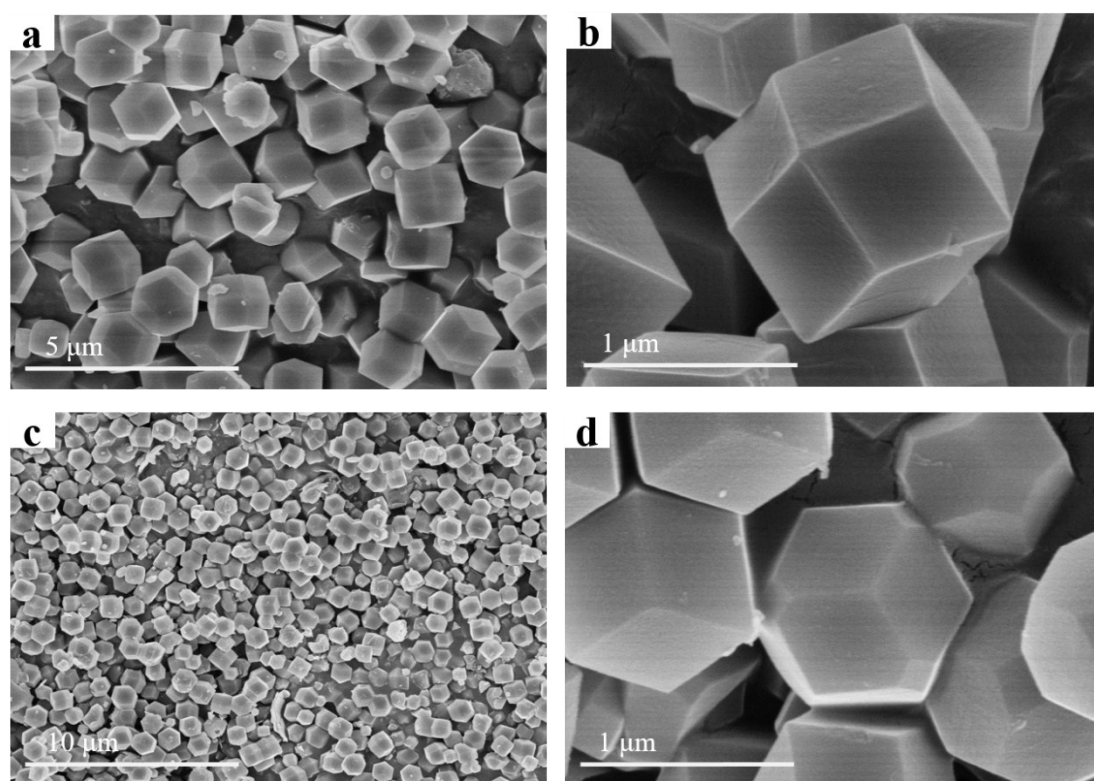

Figure S2. SEM images of ZIF-8 (a, b) and ZIF-8 derived N doped porous carbon (c, d).

| <b>Sample</b>  | <b>N-6</b> | <b>N-5</b> | <b>Quaternary N</b> | <b>Pyridine N-oxide</b> |
|----------------|------------|------------|---------------------|-------------------------|
| <b>N-HPCNF</b> | 59.6%      | 35.6%      | 4.8%                | 0                       |
| <b>CNF</b>     | 0          | 28%        | 54.2%               | 17.8%                   |

Table S1. Detail breakdown of N1s signal showing relative composition of different surface nitrogen groups.

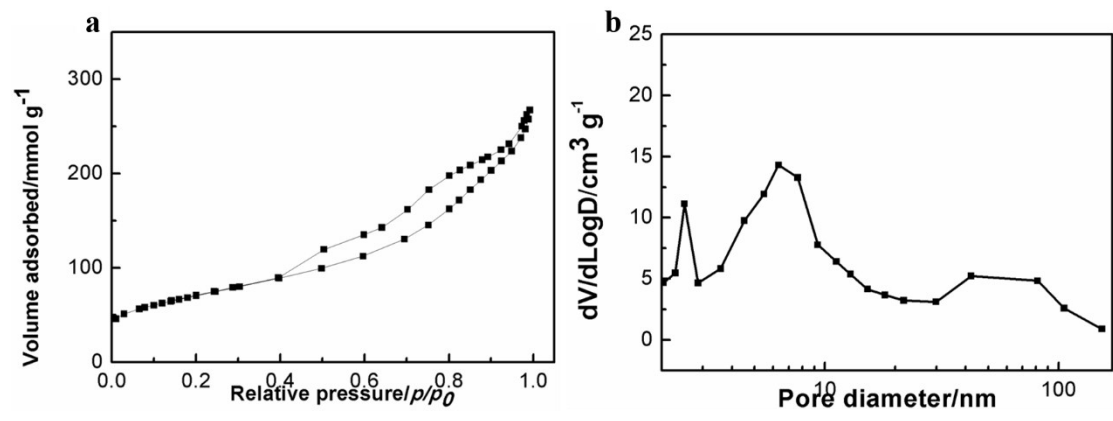

Figure S3. N<sub>2</sub> adsorption/desorption isotherms and the corresponding pore-size-distribution curve of N-HPCNF.

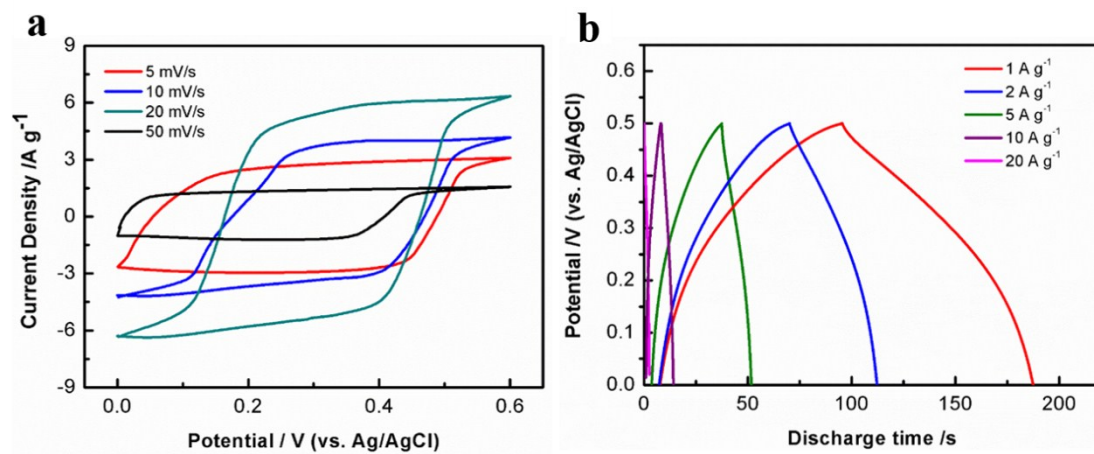

Figure S4. CV curves (a) and galvanostatic charge-discharge curves (b) for ZIF-8 derived carbon.

| Electrode                                        | Electrolyte | Highest capacitance<br>(F g <sup>-1</sup> ) | Lowest capacitance<br>(F g <sup>-1</sup> ) | Rate<br>capability (%) | Reference |
|--------------------------------------------------|-------------|---------------------------------------------|--------------------------------------------|------------------------|-----------|
| Hierarchical porous carbon microbeads            | 6 M KOH     | 320 (0.05 A g <sup>-1</sup> ) <sup>1)</sup> | 193 (100 A g <sup>-1</sup> )               | 60.3                   | S1        |
| N-doped carbon spheres                           | 6 M KOH     | 356 (0.2 A g <sup>-1</sup> )                | 196 (10 A g <sup>-1</sup> )                | 55.1                   | S2        |
| 3D nitrogen doped carbon networks                | 6 M KOH     | 304 (0.5 A g <sup>-1</sup> )                | 226 (20 A g <sup>-1</sup> )                | 74.3                   | S3        |
| 3D beehive-like hierarchical porous carbon       | 6 M KOH     | 314 (0.5 A g <sup>-1</sup> )                | 237 (20 A g <sup>-1</sup> )                | 75.5                   | S4        |
| Bagasse waste-derived hierarchical porous carbon | 6 M KOH     | 320 (0.5 A g <sup>-1</sup> )                | 227 (50 A g <sup>-1</sup> )                | 70.9                   | S5        |
| GO-induced layered porous carbon                 | 6 M KOH     | 455 (0.5 A g <sup>-1</sup> )                | 221 (3 A g <sup>-1</sup> )                 | 48.6                   | S6        |
| Honeycomb-like porous carbon                     | 6 M KOH     | 342 (0.2 A g <sup>-1</sup> )                | 212 (20 A g <sup>-1</sup> )                | 62                     | S7        |
| Flour-derived honeycomb-like carbon foam         | 6 M KOH     | 473 (0.5 A g <sup>-1</sup> )                | 275 (20 A g <sup>-1</sup> )                | 58.1                   | S8        |

Table S2. Summary of the rate performance of some carbon electrodes.

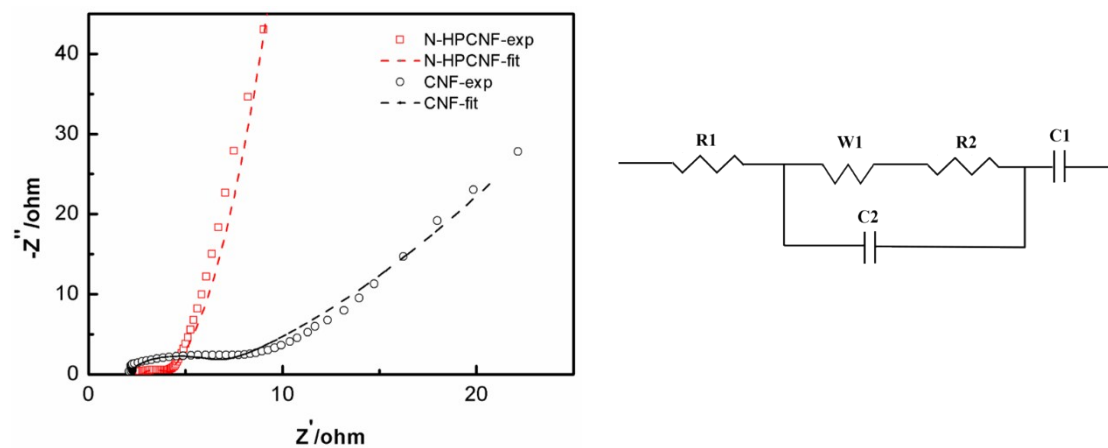

Figure S5. The fitted Nyquist plots and equivalent circuit of N-HPCNF and CNF.

$R1$  is the equivalent internal resistance, including resistance of the electrolyte and the internal resistance of the electrode;  $W1$  is the Warburg diffusion element; and  $R2$  is charge transfer resistance.



## Reference

- S1. Y. Ma, B. Yu, Y. Guo and C. Wang, *J. Solid State Electrochem.*, 2016, 20, 2231.
- S2. Z. Wang, L. Sun, F. Xu, X. Peng, Y. Zou, H. Chu, L. Ouyang and M. Zhud, *RSC Adv.*, 2016, 6, 1422.
- S3. H. Peng, G. Ma, K. Sun, J. Mu, Z. Zhang and Z. Lei, *J. Phys. Chem. C*, 2014, 118, 29507.
- S4. L. Yao, G. Yang, P. Han, Z. Tang and J. Yang, *J. Power Sources*, 2016, 315, 209.
- S5. S. Zhu, J. Li, C. He, N. Zhao, E. Liu, C. Shi and M. Zhang, *J. Mater. Chem. A*, 2015, 3, 22266.
- S6. X. Zhang, Y. Jiao, L. Sun, L. Wang, A. Wu, H. Yan, M. Meng, C. Tian, B. Jiang and H. Fu, *Nanoscale*, 2016, 8, 2418.
- S7. Q. Liang, L. Ye, Z.-H. Huang, Q. Xu, Y. Bai, F. Kang and Q.-H. Yang, *Nanoscale*, 2014, 6, 13831.
- S8. X. Wu, L. Jiang, C. Long and Z. Fan, *Nano Energy*, 2015, 13, 527.
